# Supplementary material for: The impact of site selectivity and disorder on the thermoelectric properties of Yb21Mn4Sb18 solid solutions: Yb21Mn4−xCdxSb18 and Yb21−yCayMn4Sb18
Source: Royal Society of Chemistry journal article supplement (doi:10.1039/d1ma00497b), 2021-01-01
Supplement: d1ma00497b1.pdf [file d1ma00497b1.pdf]

**The Impact of Site Selectivity and Disorder on the Thermoelectric Properties of Yb<sub>21</sub>Mn<sub>4</sub>Sb<sub>18</sub> solid solutions: Yb<sub>21</sub>Mn<sub>4-x</sub>Cd<sub>x</sub>Sb<sub>18</sub> and Yb<sub>21-y</sub>Ca<sub>y</sub>Mn<sub>4</sub>Sb<sub>18</sub>**

Allan He<sup>1</sup>, Giacomo Cerretti<sup>2</sup>, and Susan M. Kauzlarich<sup>1\*</sup>

<sup>1</sup>Department of Chemistry, One Shields Ave, University of California, Davis, California 95616, United States

<sup>2</sup>Jet Propulsion Laboratory, California Institute of Technology, 4800 Oak Grove Drive, MS 277-105, Pasadena, California 91125, United States

\*corresponding email: [smkauzlarich@ucdavis.edu](mailto:smkauzlarich@ucdavis.edu)

## SUPPORTING INFORMATION

**Table S1:** Rietveld Refinement Results for Yb<sub>21</sub>Mn<sub>4-x</sub>Cd<sub>x</sub>Sb<sub>18</sub> with  $2\theta = 2^\circ - 35^\circ$  from Synchrotron Powder X-ray Diffraction (11-BM)

| Composition                           | x = 0.5                                                                                                           | x = 1.0                                                                                                          | x = 1.5                                                                                                          |
|---------------------------------------|-------------------------------------------------------------------------------------------------------------------|------------------------------------------------------------------------------------------------------------------|------------------------------------------------------------------------------------------------------------------|
| Wavelength                            | 0.457844 Å                                                                                                        |                                                                                                                  |                                                                                                                  |
| Crystal System                        | Monoclinic                                                                                                        |                                                                                                                  |                                                                                                                  |
| Space Group                           | C2/c                                                                                                              |                                                                                                                  |                                                                                                                  |
| Unit Cell Dimensions                  | a = 17.0365(2) Å<br>b = 17.0266(2) Å<br>c = 16.7977(2) Å<br>β = 92.7775(5)°                                       | a = 17.0176(4) Å<br>b = 17.0267(4) Å<br>c = 16.8062(3) Å<br>β = 92.718(1)°                                       | a = 17.0449(2) Å<br>b = 17.0000(2) Å<br>c = 16.8422(2) Å<br>β = 92.7222(6)°                                      |
| Volume (Å <sup>3</sup> )              | 4866.8(1)                                                                                                         | 4864.2(2)                                                                                                        | 4874.7(1)                                                                                                        |
| Cd Site Occupation (free)             | Mn1 = 0.29(4)<br>Mn2 = 0.00(3)<br>Mn3 = 0.05(3)<br>Mn4 = 0.22(3)<br>Total Cd = 0.57(7)<br>R <sub>wp</sub> = 6.906 | Mn1 = 0.75(7)<br>Mn2 = 0.00(8)<br>Mn3 = 0.18(5)<br>Mn4 = 0.11(7)<br>Total Cd = 1.0(1)<br>R <sub>wp</sub> = 8.552 | Mn1 = 0.88(3)<br>Mn2 = 0.00(3)<br>Mn3 = 0.07(3)<br>Mn4 = 0.31(3)<br>Total Cd = 1.3(1)<br>R <sub>wp</sub> = 5.831 |
| Refined Composition (free)            | Yb <sub>21</sub> Mn <sub>3.43(7)</sub> Cd <sub>0.57(7)</sub> Sb <sub>18</sub>                                     | Yb <sub>21</sub> Mn <sub>3.0(1)</sub> Cd <sub>1.0(1)</sub> Sb <sub>18</sub>                                      | Yb <sub>21</sub> Mn <sub>2.7(1)</sub> Cd <sub>1.3(1)</sub> Sb <sub>18</sub>                                      |
| Cd Site Occupation (constrained occ.) | Mn1 = 0.25(5)<br>Mn2 = 0.00(3)<br>Mn3 = 0.00(3)<br>Mn4 = 0.25(3)<br>Total Cd = 0.500<br>R <sub>wp</sub> = 6.907   | Mn1 = 0.65(11)<br>Mn2 = 0.00(3)<br>Mn3 = 0.35(5)<br>Mn4 = 0.00(6)<br>Total Mn = 1.000<br>R <sub>wp</sub> = 8.532 | Mn1 = 0.96(5)<br>Mn2 = 0.00(3)<br>Mn3 = 0.20(3)<br>Mn4 = 0.34(2)<br>Total Mn = 1.500<br>R <sub>wp</sub> = 5.834  |
| Mn1 – Mn2                             | 3.64(3) Å                                                                                                         | 3.74(5) Å                                                                                                        | 4.004(2) Å                                                                                                       |
| Mn2 – Mn3                             | 2.35(3) Å                                                                                                         | 2.40(5) Å                                                                                                        | 2.07(3) Å                                                                                                        |
| Mn3 – Mn4                             | 2.75(2) Å                                                                                                         | 2.63(3) Å                                                                                                        | 2.65(3) Å                                                                                                        |

**Table S2:** Rietveld Refinement Results for  $\text{Yb}_{21-y}\text{Ca}_y\text{Mn}_4\text{Sb}_{18}$  with  $2\theta = 2^\circ - 35^\circ$  from Synchrotron Powder X-ray Diffraction (11-BM)

| Composition                          | y = 3.0                                                                                                                                                                                                                                   | y = 6.0                                                                                                                                                                                                                                   | y = 9.0                                                                                                                                                                                                                                   | y = 10.5                                                                                                                                                                                                                                  |
|--------------------------------------|-------------------------------------------------------------------------------------------------------------------------------------------------------------------------------------------------------------------------------------------|-------------------------------------------------------------------------------------------------------------------------------------------------------------------------------------------------------------------------------------------|-------------------------------------------------------------------------------------------------------------------------------------------------------------------------------------------------------------------------------------------|-------------------------------------------------------------------------------------------------------------------------------------------------------------------------------------------------------------------------------------------|
| Wavelength                           | 0.457844 Å                                                                                                                                                                                                                                |                                                                                                                                                                                                                                           |                                                                                                                                                                                                                                           |                                                                                                                                                                                                                                           |
| Crystal System                       | Monoclinic                                                                                                                                                                                                                                |                                                                                                                                                                                                                                           |                                                                                                                                                                                                                                           |                                                                                                                                                                                                                                           |
| Space Group                          | C2/c                                                                                                                                                                                                                                      |                                                                                                                                                                                                                                           |                                                                                                                                                                                                                                           |                                                                                                                                                                                                                                           |
| Unit Cell Dimensions                 | a = 17.0580(2) Å<br>b = 17.0566(2) Å<br>c = 16.7969(2) Å<br>$\beta = 92.8587(4)^\circ$                                                                                                                                                    | a = 17.0845(2) Å<br>b = 17.0649(2) Å<br>c = 16.8196(2) Å<br>$\beta = 92.9170(4)^\circ$                                                                                                                                                    | a = 17.1042(2) Å<br>b = 17.0694(2) Å<br>c = 16.8373(2) Å<br>$\beta = 92.9772(4)^\circ$                                                                                                                                                    | a = 17.1160(2) Å<br>b = 17.0665(2) Å<br>c = 16.8523(2) Å<br>$\beta = 93.0095(4)^\circ$                                                                                                                                                    |
| Volume (Å <sup>3</sup> )             | 4880.99(8)                                                                                                                                                                                                                                | 4897.32(8)                                                                                                                                                                                                                                | 4909.2(1)                                                                                                                                                                                                                                 | 4915.96(9)                                                                                                                                                                                                                                |
| Ca Site Occupation (free)            | Yb1: 0.202(6)<br>Yb2: 0.204(7)<br>Yb3: 0.126(6)<br>Yb4: 0.224(7)<br>Yb5: 0.140(7)<br>Yb6: 0.096(7)<br>Yb7: 0.157(7)<br>Yb8: 0.173(7)<br>Yb9: 0.159(8)<br>Yb10: 0.137(7)<br>Yb11: 0.242(9)<br>Total Ca: 1.86(2)<br>R <sub>wp</sub> : 6.945 | Yb1: 0.290(6)<br>Yb2: 0.370(7)<br>Yb3: 0.237(6)<br>Yb4: 0.357(7)<br>Yb5: 0.267(8)<br>Yb6: 0.218(7)<br>Yb7: 0.297(8)<br>Yb8: 0.327(8)<br>Yb9: 0.343(8)<br>Yb10: 0.281(7)<br>Yb11: 0.392(9)<br>Total Ca: 3.38(2)<br>R <sub>wp</sub> : 6.187 | Yb1: 0.427(6)<br>Yb2: 0.519(7)<br>Yb3: 0.345(6)<br>Yb4: 0.502(7)<br>Yb5: 0.447(8)<br>Yb6: 0.386(6)<br>Yb7: 0.467(7)<br>Yb8: 0.508(8)<br>Yb9: 0.501(8)<br>Yb10: 0.462(7)<br>Yb11: 0.479(9)<br>Total Ca: 5.04(2)<br>R <sub>wp</sub> : 6.374 | Yb1: 0.498(5)<br>Yb2: 0.581(5)<br>Yb3: 0.421(5)<br>Yb4: 0.554(5)<br>Yb5: 0.542(6)<br>Yb6: 0.475(5)<br>Yb7: 0.532(6)<br>Yb8: 0.584(6)<br>Yb9: 0.542(6)<br>Yb10: 0.553(5)<br>Yb11: 0.552(7)<br>Total Ca: 5.83(2)<br>R <sub>wp</sub> : 5.834 |
| Refined Composition (free)           | $\text{Yb}_{17.45(2)}\text{Ca}_{3.55(2)}\text{Mn}_4\text{Sb}_{18}$                                                                                                                                                                        | $\text{Yb}_{14.55(2)}\text{Ca}_{6.45(2)}\text{Mn}_4\text{Sb}_{18}$                                                                                                                                                                        | $\text{Yb}_{11.38(2)}\text{Ca}_{9.62(2)}\text{Mn}_4\text{Sb}_{18}$                                                                                                                                                                        | $\text{Yb}_{9.86(2)}\text{Ca}_{11.13(2)}\text{Mn}_4\text{Sb}_{18}$                                                                                                                                                                        |
| Ca Site Occupation (constrained Occ) | Yb1: 0.167(6)<br>Yb2: 0.188(7)<br>Yb3: 0.103(6)<br>Yb4: 0.198(7)<br>Yb5: 0.133(8)<br>Yb6: 0.068(7)<br>Yb7: 0.110(8)<br>Yb8: 0.157(8)<br>Yb9: 0.121(8)<br>Yb10: 0.115(7)<br>Yb11: 0.212(8)<br>Total Ca: 1.57143<br>R <sub>wp</sub> : 6.853 | Yb1: 0.276(6)<br>Yb2: 0.358(7)<br>Yb3: 0.215(6)<br>Yb4: 0.337(7)<br>Yb5: 0.240(8)<br>Yb6: 0.199(7)<br>Yb7: 0.291(8)<br>Yb8: 0.299(8)<br>Yb9: 0.324(8)<br>Yb10: 0.256(7)<br>Yb11: 0.349(9)<br>Total Ca: 3.14286<br>R <sub>wp</sub> : 6.177 | Yb1: 0.395(6)<br>Yb2: 0.496(7)<br>Yb3: 0.327(6)<br>Yb4: 0.470(6)<br>Yb5: 0.425(8)<br>Yb6: 0.358(6)<br>Yb7: 0.443(8)<br>Yb8: 0.486(8)<br>Yb9: 0.465(8)<br>Yb10: 0.434(7)<br>Yb11: 0.415(8)<br>Total Ca: 4.71429<br>R <sub>wp</sub> : 6.385 | Yb1: 0.467(5)<br>Yb2: 0.559(5)<br>Yb3: 0.400(5)<br>Yb4: 0.522(5)<br>Yb5: 0.524(6)<br>Yb6: 0.448(5)<br>Yb7: 0.506(6)<br>Yb8: 0.563(6)<br>Yb9: 0.503(7)<br>Yb10: 0.528(5)<br>Yb11: 0.480(7)<br>Total Ca: 5.5<br>R <sub>wp</sub> : 5.409     |

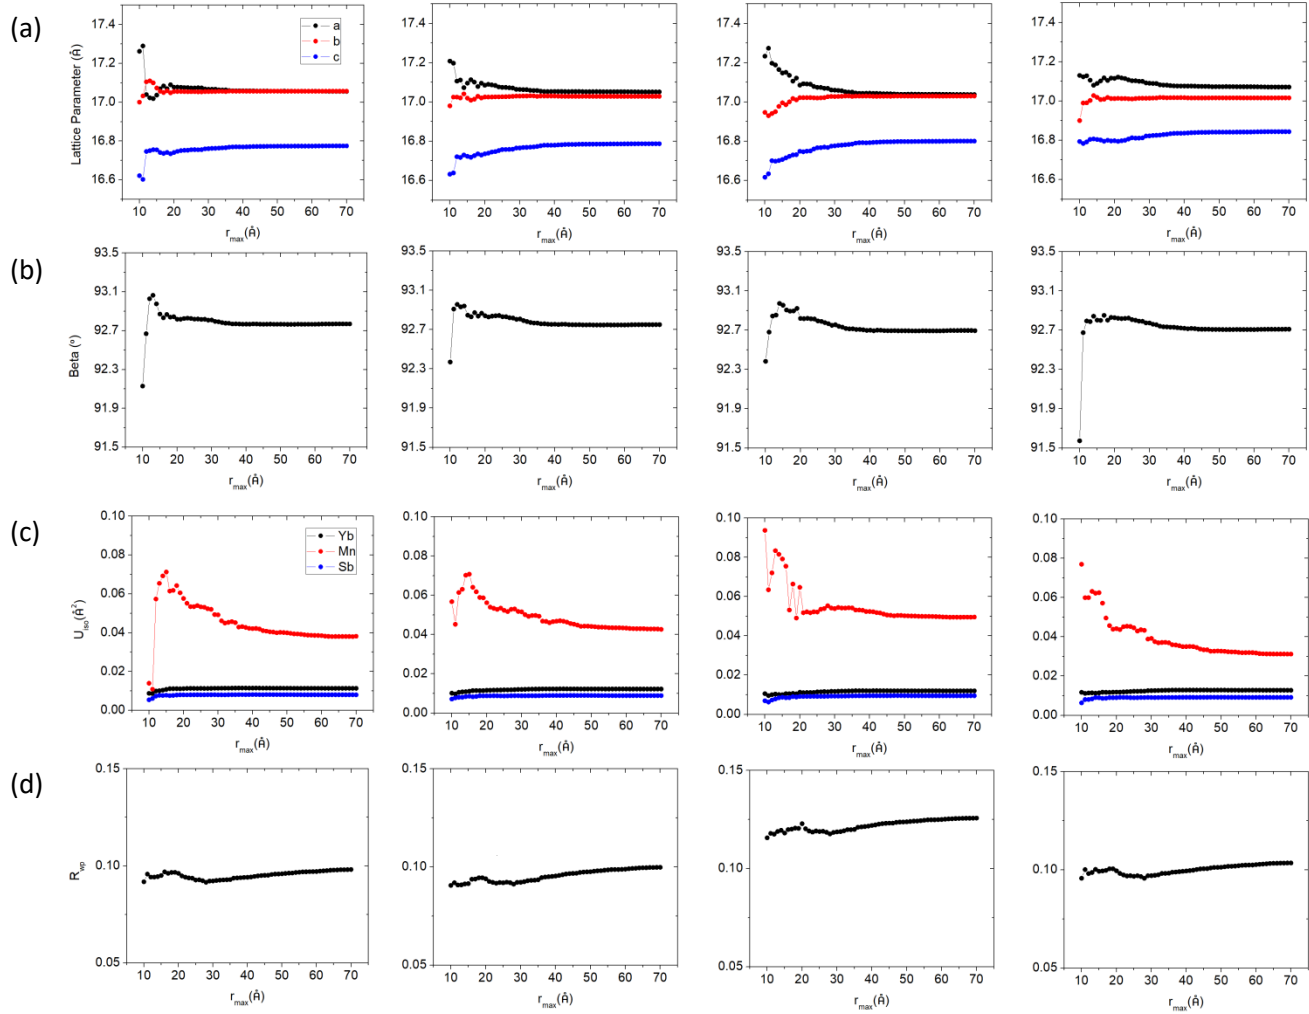

**Figure S1:** Total X-ray Scattering refinement results for  $\text{Yb}_{21}\text{Mn}_{4-x}\text{Cd}_x\text{Sb}_{18}$  ( $x = 0, 0.5, 1.0, 1.5$ ) showing (a) Lattice parameters, (b) beta angle, (c) atomic displacement parameters, (d)  $R_{\text{wp}}$  value.

**Table S3:** Total X-ray Scattering Refinement Results for  $\text{Yb}_{21}\text{Mn}_{4-x}\text{Cd}_x\text{Sb}_{18}$  ( $x = 0, 0.5, 1.0, 1.5$ ) with a Restricted  $r_{\text{max}} = 70 \text{ \AA}$

| Composition          | $x = 0$                                                                                                      | $x = 0.5$                                                                                                      | $x = 1.0$                                                                                                      | $x = 1.5$                                                                                                      |
|----------------------|--------------------------------------------------------------------------------------------------------------|----------------------------------------------------------------------------------------------------------------|----------------------------------------------------------------------------------------------------------------|----------------------------------------------------------------------------------------------------------------|
| Wavelength           | 0.2115 $\text{\AA}$                                                                                          |                                                                                                                |                                                                                                                |                                                                                                                |
| Crystal System       | Monoclinic                                                                                                   |                                                                                                                |                                                                                                                |                                                                                                                |
| Space Group          | C2/c                                                                                                         |                                                                                                                |                                                                                                                |                                                                                                                |
| Unit Cell Dimensions | $a = 17.0558 \text{ \AA}$<br>$b = 17.057 \text{ \AA}$<br>$c = 16.775 \text{ \AA}$<br>$\beta = 92.7695^\circ$ | $a = 17.0514 \text{ \AA}$<br>$b = 17.0291 \text{ \AA}$<br>$c = 16.7873 \text{ \AA}$<br>$\beta = 92.7507^\circ$ | $a = 17.0386 \text{ \AA}$<br>$b = 17.0305 \text{ \AA}$<br>$c = 16.7998 \text{ \AA}$<br>$\beta = 92.6999^\circ$ | $a = 17.0715 \text{ \AA}$<br>$b = 17.0163 \text{ \AA}$<br>$c = 16.8441 \text{ \AA}$<br>$\beta = 92.7107^\circ$ |
| $U_{\text{iso}}$     | Yb = 0.011356 $\text{\AA}^2$<br>Mn = 0.038174 $\text{\AA}^2$<br>Sb = 0.008016 $\text{\AA}^2$                 | Yb = 0.012259 $\text{\AA}^2$<br>Mn = 0.04267 $\text{\AA}^2$<br>Sb = 0.0089 $\text{\AA}^2$                      | Yb = 0.011992 $\text{\AA}^2$<br>Mn = 0.05343 $\text{\AA}^2$<br>Sb = 0.009549 $\text{\AA}^2$                    | Yb = 0.012778 $\text{\AA}^2$<br>Mn = 0.031206 $\text{\AA}^2$<br>Sb = 0.009141 $\text{\AA}^2$                   |
| $R_{\text{wp}}$      | 0.09816                                                                                                      | 0.099837                                                                                                       | 0.125745                                                                                                       | 0.103506                                                                                                       |

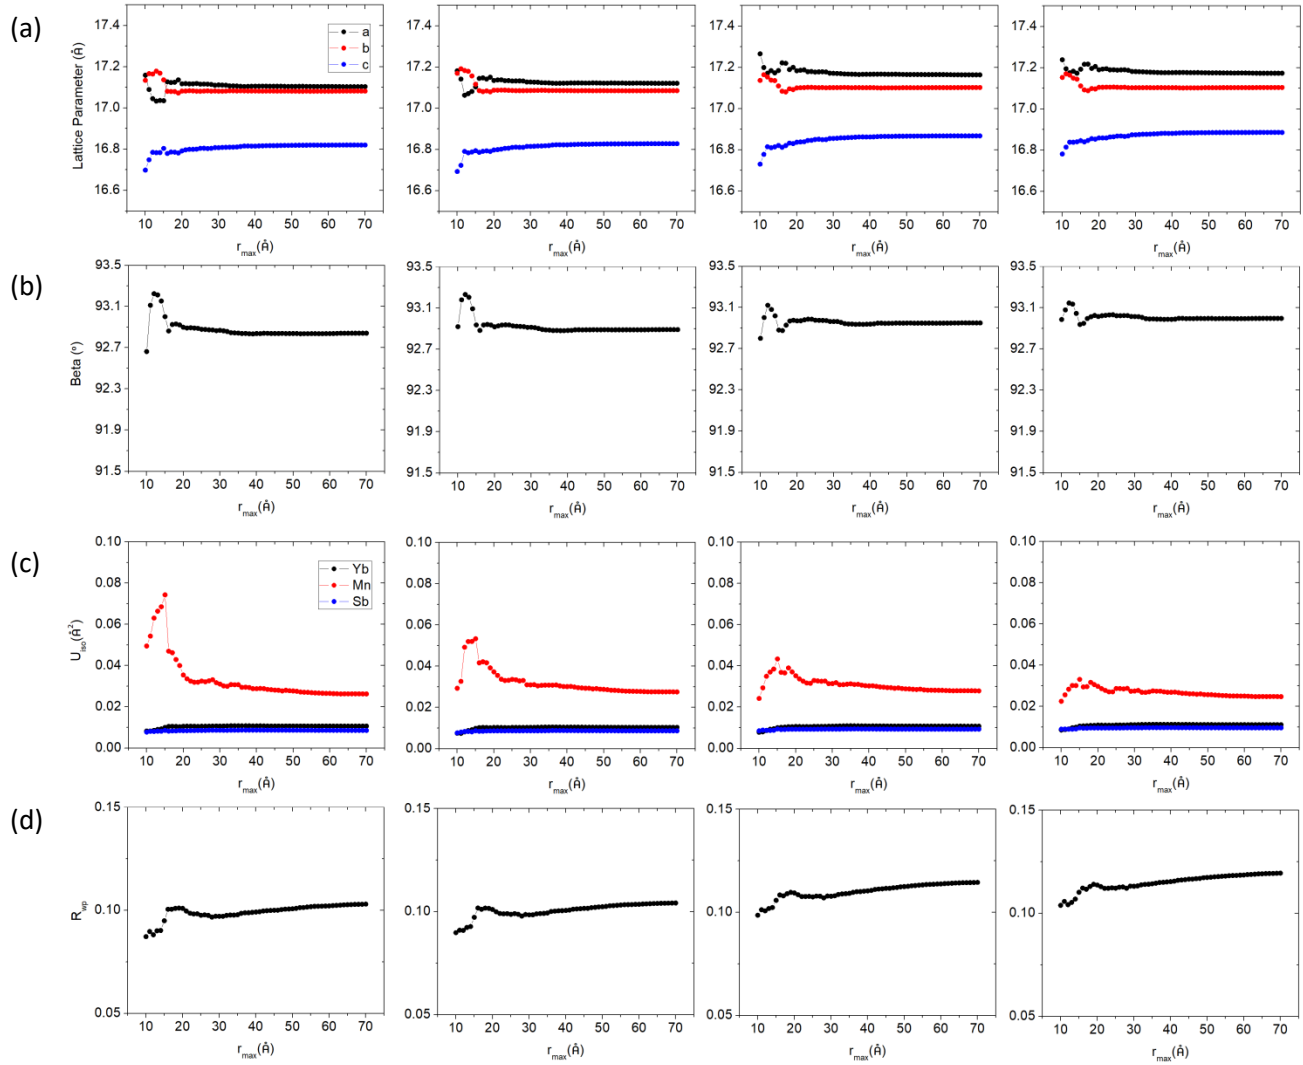

**Figure S2:** Total X-ray Scattering refinement results for  $\text{Yb}_{21-\gamma}\text{Ca}_\gamma\text{Mn}_4\text{Sb}_{18}$  ( $\gamma = 3, 6, 9, 10.5$ ) showing (a) Lattice parameters, (b) beta angle, (c) atomic displacement parameters, (d)  $R_{\text{wp}}$  value.

**Table S4:** Total X-ray Scattering Refinement Results for  $\text{Yb}_{21-y}\text{Ca}_y\text{Mn}_4\text{Sb}_{18}$  ( $y = 3, 6, 9, 10.5$ ) with a Restricted  $r_{\text{max}} = 70 \text{ \AA}$

| Composition          | $y = 3.0$                                                                                                      | $y = 6.0$                                                                                                      | $y = 9.0$                                                                                                    | $y = 10.5$                                                                                                     |
|----------------------|----------------------------------------------------------------------------------------------------------------|----------------------------------------------------------------------------------------------------------------|--------------------------------------------------------------------------------------------------------------|----------------------------------------------------------------------------------------------------------------|
| Wavelength           | 0.2115 $\text{\AA}$                                                                                            |                                                                                                                |                                                                                                              |                                                                                                                |
| Crystal System       | Monoclinic                                                                                                     |                                                                                                                |                                                                                                              |                                                                                                                |
| Space Group          | C2/c                                                                                                           |                                                                                                                |                                                                                                              |                                                                                                                |
| Unit Cell Dimensions | $a = 17.1034 \text{ \AA}$<br>$b = 17.0821 \text{ \AA}$<br>$c = 16.8201 \text{ \AA}$<br>$\beta = 92.8404^\circ$ | $a = 17.1214 \text{ \AA}$<br>$b = 17.0857 \text{ \AA}$<br>$c = 16.8284 \text{ \AA}$<br>$\beta = 92.8918^\circ$ | $a = 17.1643 \text{ \AA}$<br>$b = 17.1026 \text{ \AA}$<br>$c = 16.8679 \text{ \AA}$<br>$\beta = 92.95^\circ$ | $a = 17.1736 \text{ \AA}$<br>$b = 17.1044 \text{ \AA}$<br>$c = 16.8864 \text{ \AA}$<br>$\beta = 92.9974^\circ$ |
| $U_{\text{iso}}$     | Yb = 0.01063 $\text{\AA}^2$<br>Mn = 0.026261 $\text{\AA}^2$<br>Sb = 0.008568 $\text{\AA}^2$                    | Yb = 0.010348 $\text{\AA}^2$<br>Mn = 0.027556 $\text{\AA}^2$<br>Sb = 0.008664 $\text{\AA}^2$                   | Yb = 0.010761 $\text{\AA}^2$<br>Mn = 0.027916 $\text{\AA}^2$<br>Sb = 0.009294 $\text{\AA}^2$                 | Yb = 0.011148 $\text{\AA}^2$<br>Mn = 0.024777 $\text{\AA}^2$<br>Sb = 0.009637 $\text{\AA}^2$                   |
| $R_{\text{wp}}$      | 0.103003                                                                                                       | 0.104197                                                                                                       | 0.114528                                                                                                     | 0.119490                                                                                                       |

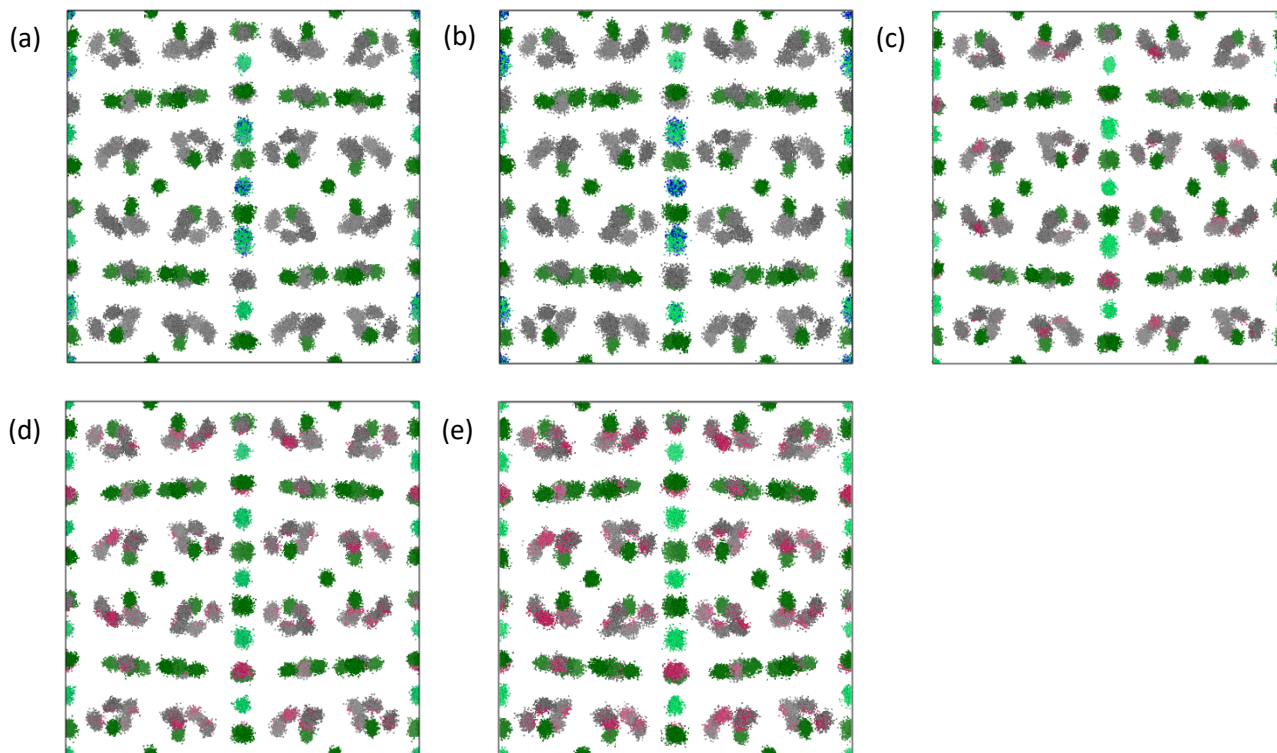

**Figure S3.** Point-cloud distributions for  $\text{Yb}_{21}\text{Mn}_{4-x}\text{Cd}_x\text{Sb}_{18}$  and  $\text{Yb}_{21-y}\text{Ca}_y\text{Mn}_4\text{Sb}_{18}$  a)  $x = 0.5$ , b)  $x = 1.0$ , c)  $y = 3$ , d)  $y = 6$ , e)  $y = 9$ .

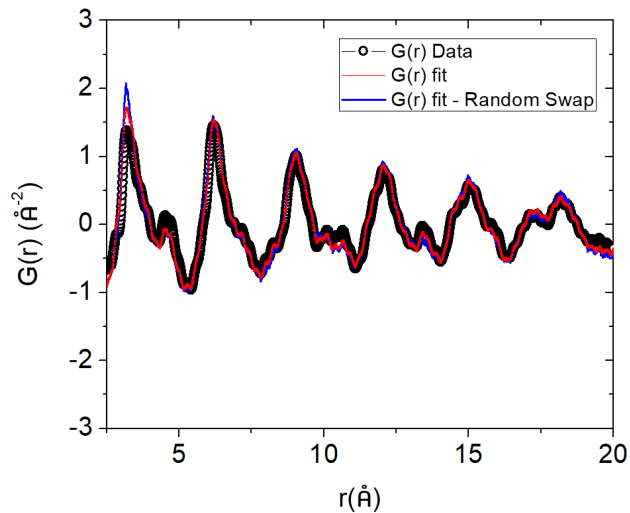

**Figure S4.** Reverse Monte Carlo fit for sample  $\text{Yb}_{10.5}\text{Ca}_{10.5}\text{Mn}_4\text{Sb}_{18}$  before (red) and after (blue) 12h random swapping of Ca and Yb atoms.

**Table S5:** Experimental Energy Dispersive X-ray Spectroscopy Results for  $\text{Yb}_{21}\text{Mn}_{4-x}\text{Cd}_x\text{Sb}_{18}$  ( $x = 0.5, 1.0, 1.5$ ) Pellets

| $\text{Yb}_{21}\text{Mn}_{4-x}\text{Cd}_x\text{Sb}_{18}$                             | Yb (at. %) | Mn (at. %) | Cd (at. %) | Sb (at. %) |
|--------------------------------------------------------------------------------------|------------|------------|------------|------------|
| $\text{Yb}_{21}\text{Mn}_{3.5}\text{Cd}_{0.5}\text{Sb}_{18}$ (nominal) ( $x = 0.5$ ) | 48.84      | 8.14       | 1.16       | 41.86      |
| $\text{Yb}_{21}\text{Mn}_{3.5}\text{Cd}_{0.5}\text{Sb}_{18}$ (EDS) ( $x = 0.5$ )     | 48(3)      | 8.1(4)     | 1.4(1)     | 43(2)      |
| $\text{Yb}_{21}\text{Mn}_{3.0}\text{Cd}_{1.0}\text{Sb}_{18}$ (nominal) ( $x = 1.0$ ) | 48.84      | 6.98       | 2.32       | 41.86      |
| $\text{Yb}_{21}\text{Mn}_{3.0}\text{Cd}_{1.0}\text{Sb}_{18}$ (EDS) ( $x = 1.0$ )     | 48(2)      | 6.9(3)     | 2.6(1)     | 43(2)      |
| $\text{Yb}_{21}\text{Mn}_{2.5}\text{Cd}_{1.5}\text{Sb}_{18}$ (nominal) ( $x = 1.5$ ) | 48.84      | 5.81       | 3.49       | 41.86      |
| $\text{Yb}_{21}\text{Mn}_{2.5}\text{Cd}_{1.5}\text{Sb}_{18}$ (EDS) ( $x = 1.5$ )     | 48(2)      | 6.0(2)     | 3.7(1)     | 43(1)      |

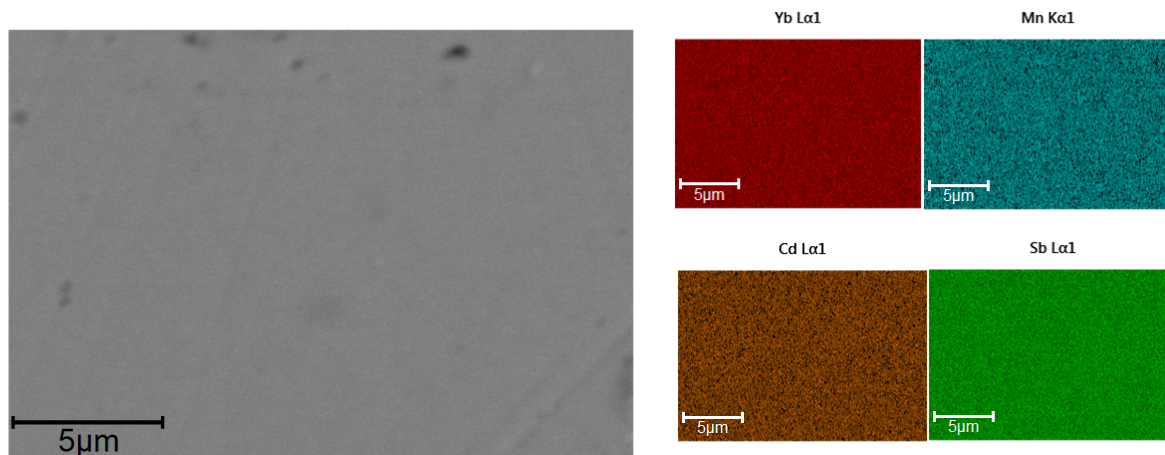

**Figure S5.** Backscattered electron images of  $x = 1.0$  sample ( $\text{Yb}_{21}\text{Mn}_3\text{CdSb}_{18}$ ) (left) after SPS along with elemental mapping (right).

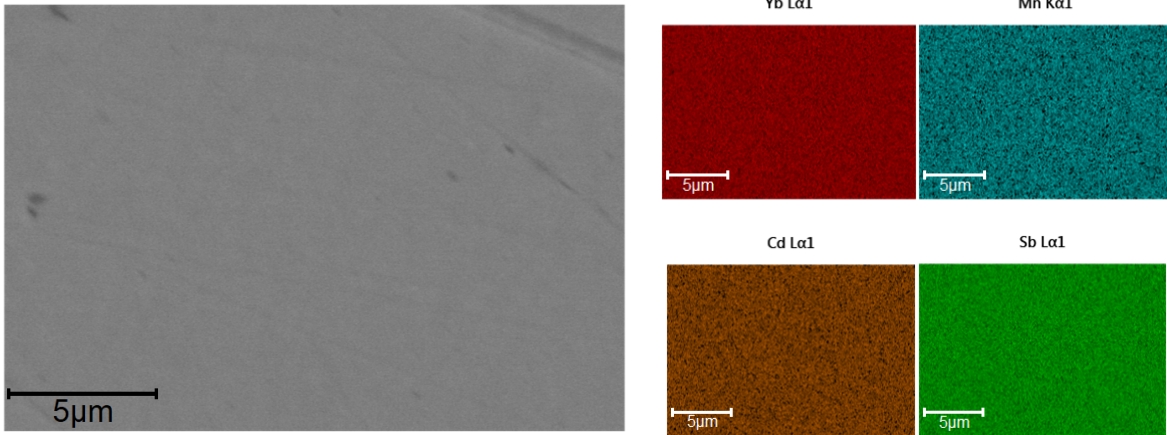

**Figure S6.** Backscattered electron images of  $x = 1.5$  sample ( $\text{Yb}_{21}\text{Mn}_{2.5}\text{Cd}_{1.5}\text{Sb}_{18}$ ) (left) after SPS along with elemental mapping (right).

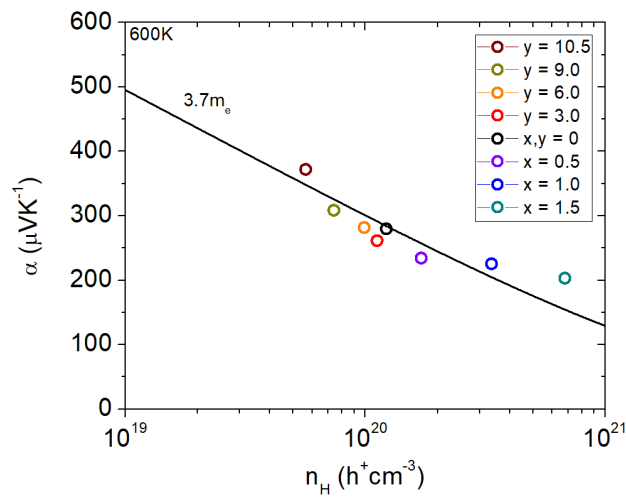

**Figure S7.** Pisarenko plot for the Cd-substituted ( $\text{Yb}_{21}\text{Mn}_{4-x}\text{Cd}_x\text{Sb}_{18}$ ) samples and Ca-substituted ( $\text{Yb}_{21-y}\text{Ca}_y\text{Mn}_4\text{Sb}_{18}$ ) samples.

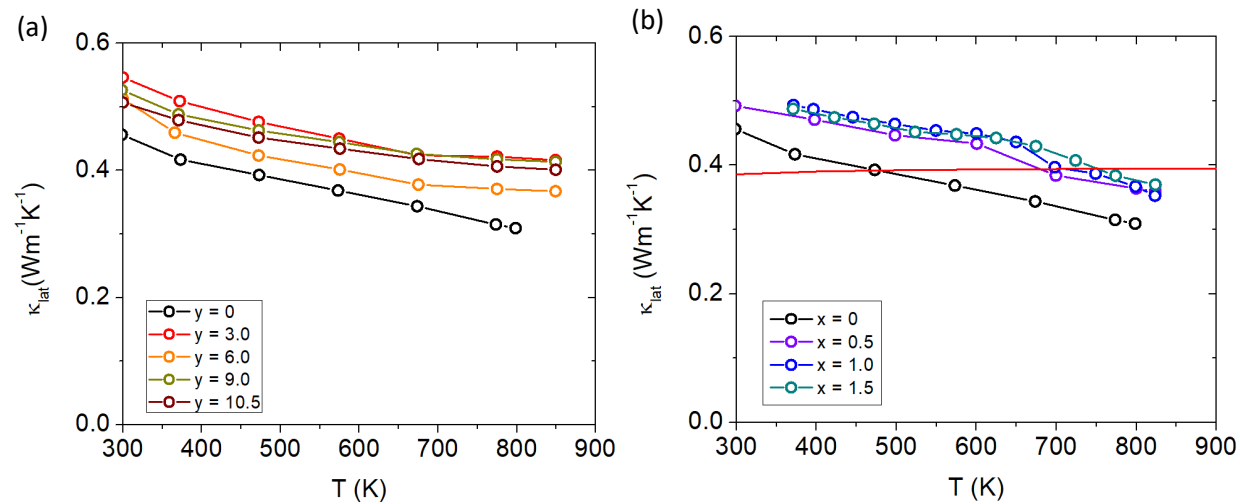

**Figure S8.** Lattice Thermal Conductivities for the a) Ca-substituted samples and b) Cd-substituted samples, plotted with  $\kappa_{\text{min}}$  of the parent ( $x = 0$ ) sample (red line) determined from speed of sound measurements.
